# Supplementary material for: Dual role of MdSND1 in the biosynthesis of lignin and in signal transduction in response to salt and osmotic stress in apple
Source: PubMed Central journal article supplement (PMC7705020; doi:10.1038/s41438-020-00433-7), 2020-12-01
Supplement: 41438_2020_433_MOESM1_ESM.pdf [file 41438_2020_433_MOESM1_ESM.pdf]

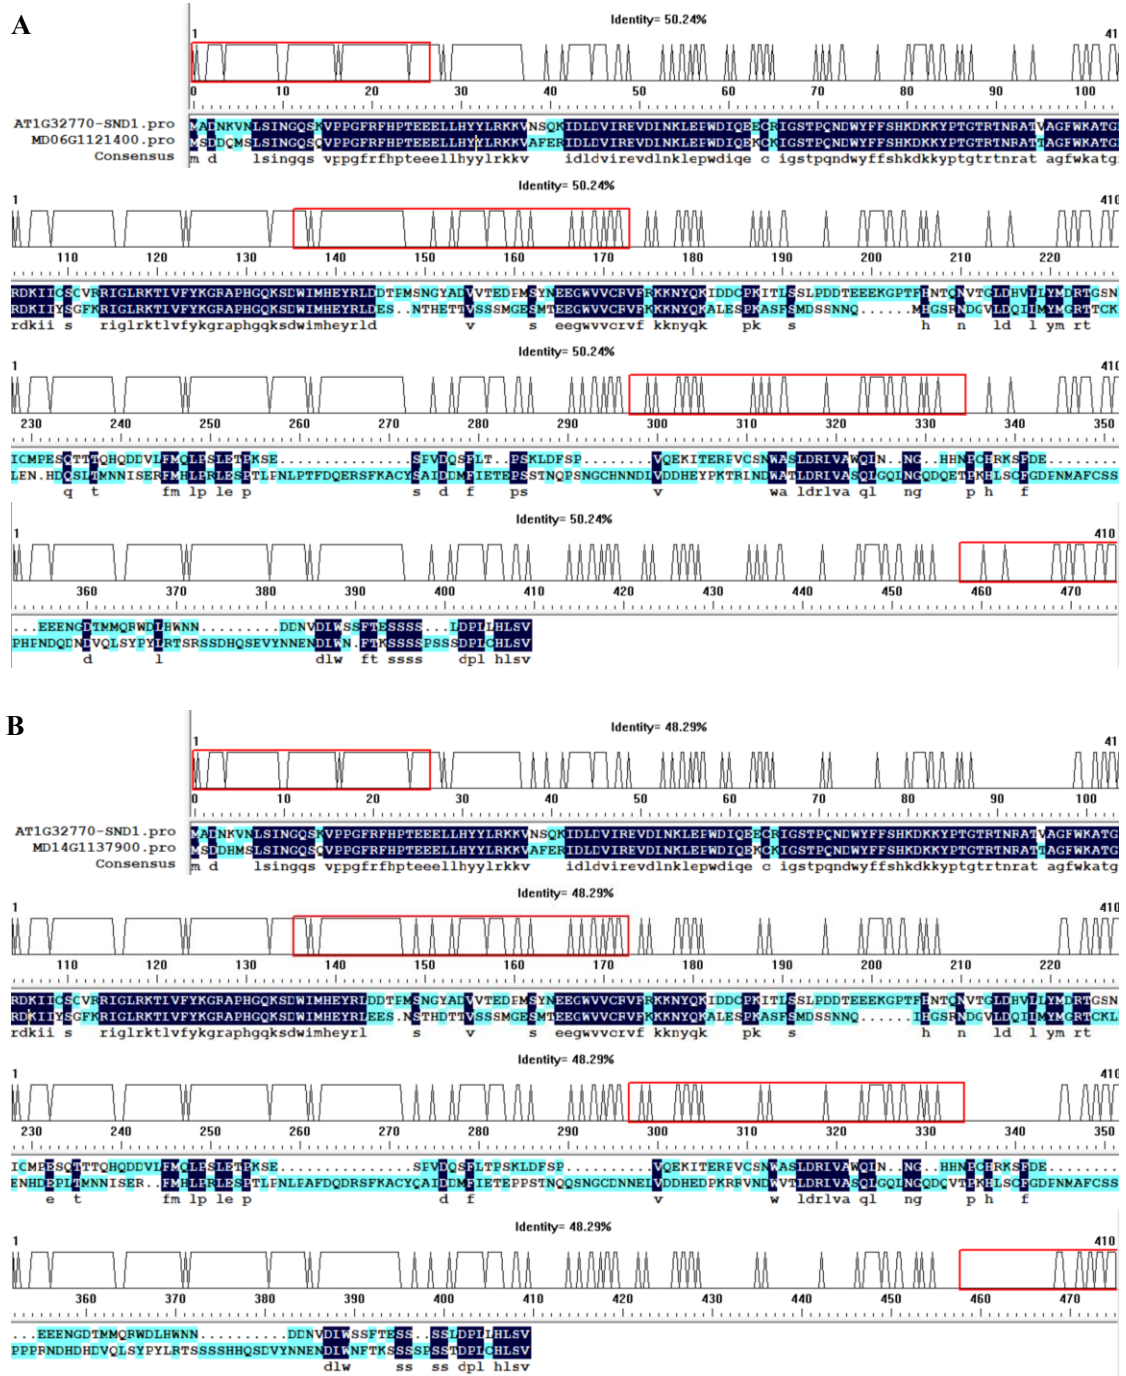

Fig. S1. Multiple sequence alignments of AtSND1 with MD06G1121400 (A) and MD14G1137900 (B).

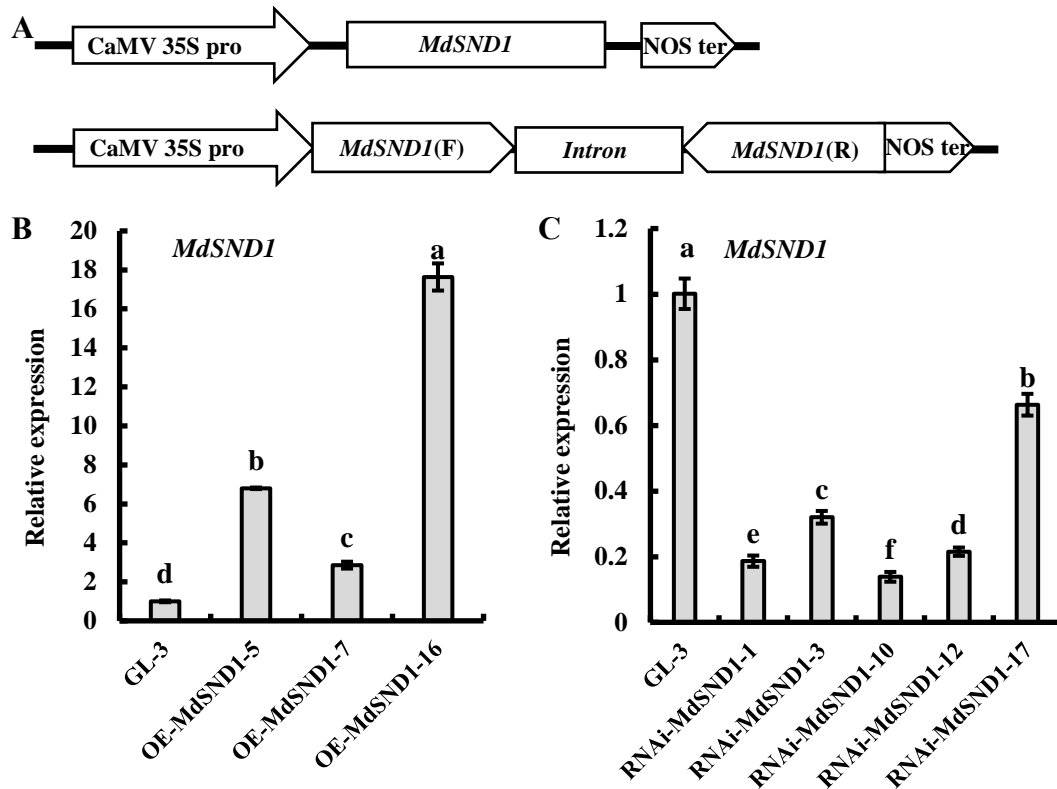

**Fig. S2. Transcriptional levels of *MdsND1* in transgenic apple.** A. Schematic shown the overexpressing and RNAi vector of *MdsND1*. B. *MdsND1* expression levels in non-transgenic GL-3 apple plants and *MdsND1*-overexpressing apple plants (OE-MdsND1). C. *MdsND1* expression levels in non-transgenic GL-3 apple plants and *MdsND1*-RNAi plants (RNAi-MdsND1). The error bars indicate the standard deviation (SD) from three biological replicates. The letters indicate the level of difference ( $P < 0.05$ , based on Duncan's multiple range test).

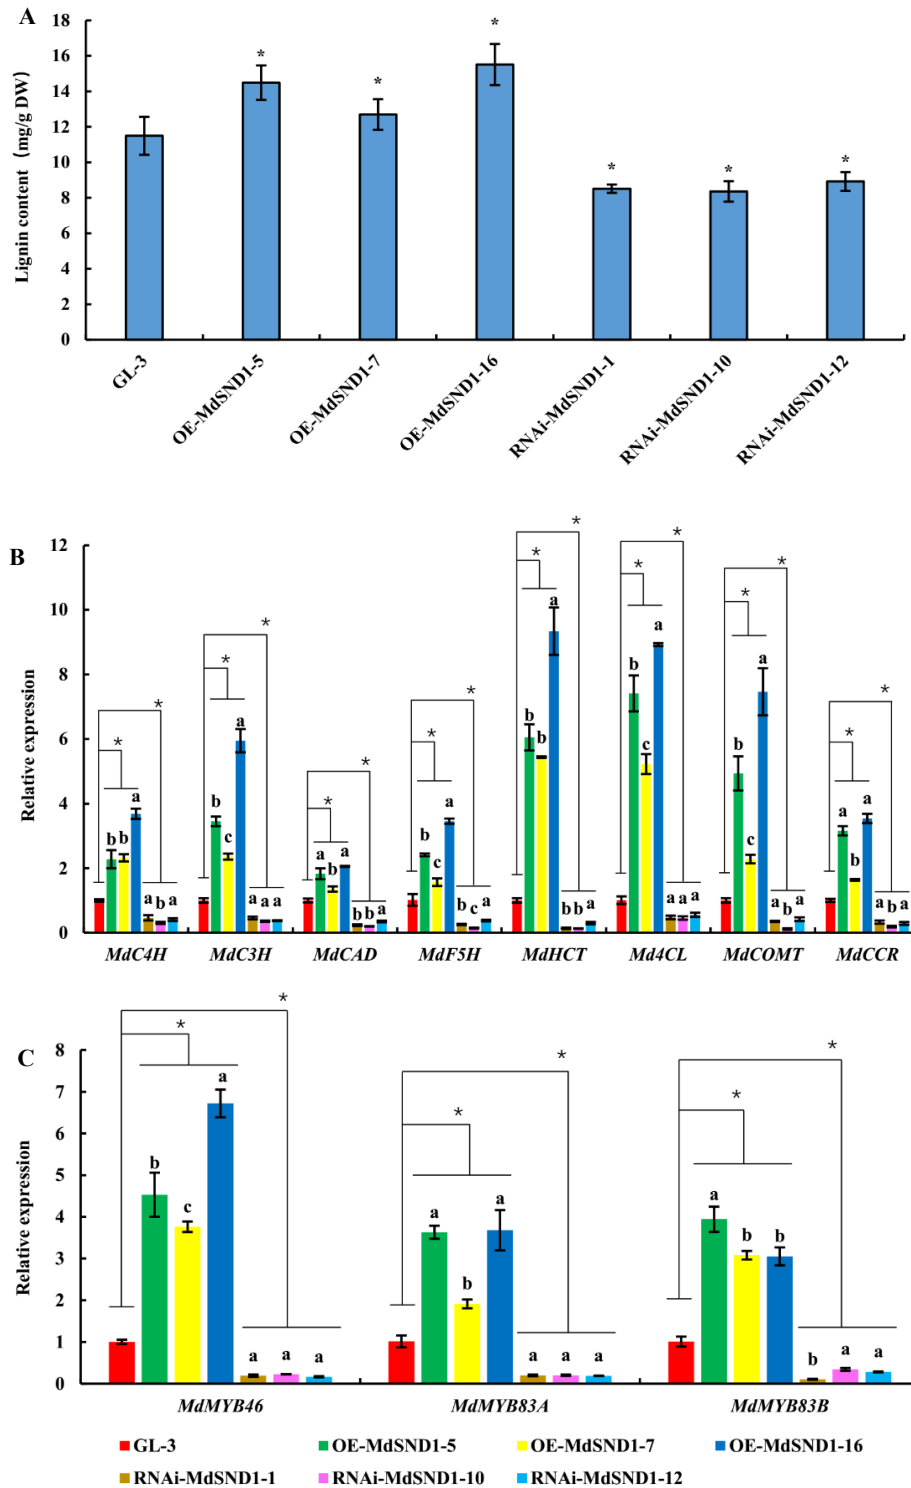

**Fig. S3. The lignin content and the expression of lignin biosynthesis related genes in *MdSND1* transgenic apple.** A. The content of lignin in *MdSND1* transgenic apples. B. Transcriptional levels of *MdMYB46* and *MdMYB83* in *MdSND1* transgenic apples. C. Transcriptional levels of lignin biosynthesis related genes in *MdSND1* transgenic apples. The error bars indicate the standard deviation (SD) from three biological replicates, \* $P < 0.05$  (based on t-test). The letters indicate the level of difference ( $P < 0.05$ , based on Duncan's multiple range test).

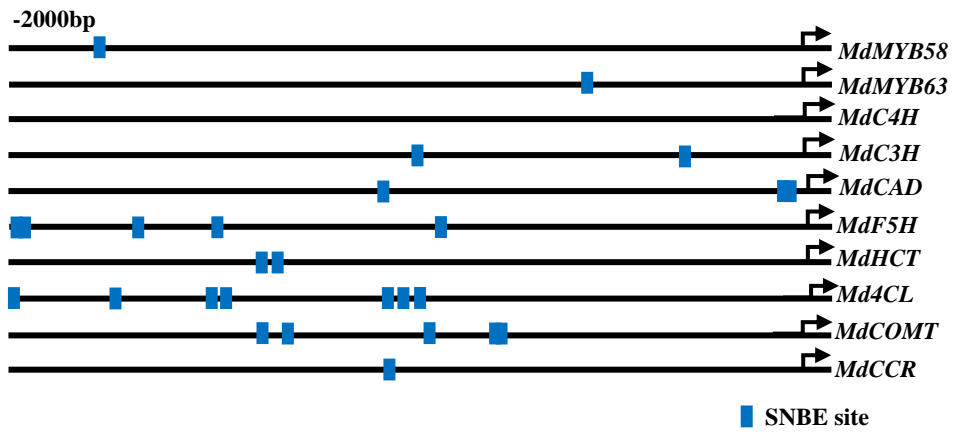

Fig. S4 The SNBE site analysis in the promoter of lignin biosynthesis genes.

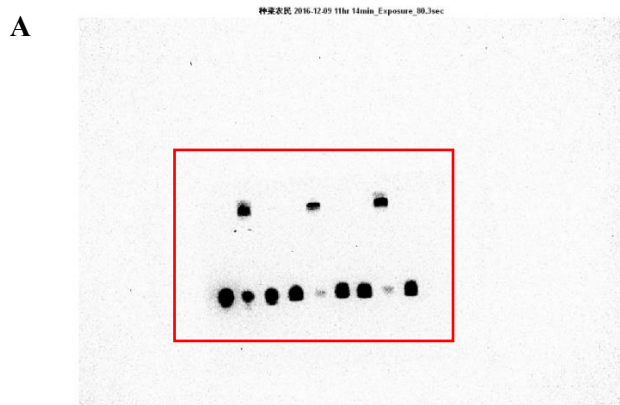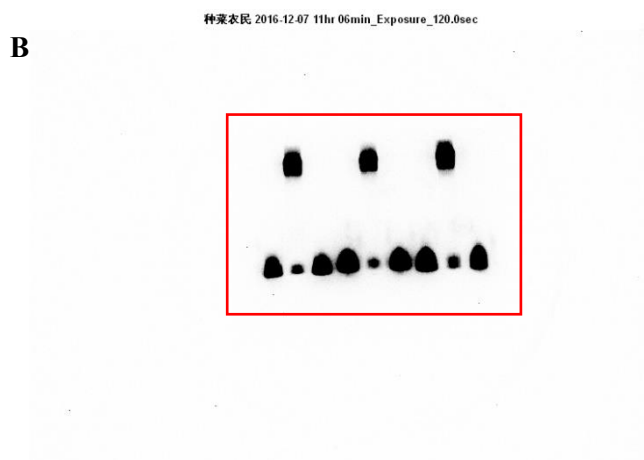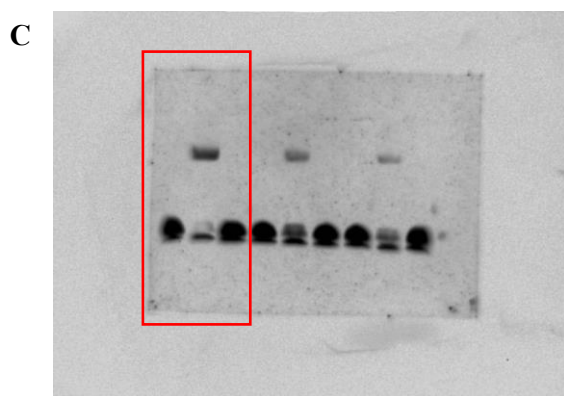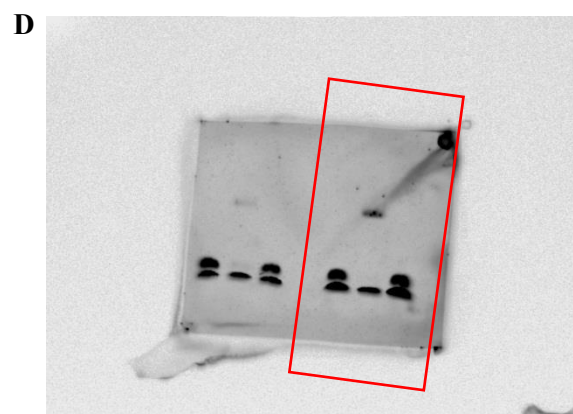

**Fig. S5. Original gels images used in the study**

A. The original imagine in Fig. 5C. The original gels in the red frame correspond that in Fig. 5C.

B. The original imagine of the binding blot on pMdAREB1A-P1, pMdAREB1B-P3, pMdRD22-P3 in Fig. 7C. The original gels in the red frame correspond the part of pMdAREB1A-P1, pMdAREB1B-P3, pMdRD22-P3 in Fig. 7C.

C. The original imagine of the binding blot on pMdDREB2A-P2. The original gels in the red frame correspond the part of pMdDREB2A-P2 in Fig. 7C.

D. The original imagine of the binding blot on pMdRD29A-P1. The original gels in the red frame correspond the part of pMdRD29A-P1 in Fig. 7C.

**Table S1** Primers used in this study

| <b>Primer Name</b>        | <b>Primer Sequence</b>                                                                                                   |
|---------------------------|--------------------------------------------------------------------------------------------------------------------------|
| MdSND1-pRI                | F: GTCGACATGTCAGATGATCAAATGAGT<br>R: GGATCCTTACACCGACAAGTGGCAAAG                                                         |
| MdSND1-pGEX               | F: GGATCCCCATGTCAGATGATCAAATGAGT<br>R:GTCGACCACCGACAAGTGGCAAAGCGG                                                        |
| MYC-MdSND1-pRI            | F: GTCGACATGGAACAAAAGTTGATTTCTGAA<br>GAAGATCTTATGTCAGATGATCAAATGAGT<br>R: GGATCCTTACACCGACAAGTGGCAAAG                    |
| RNAi-MdSND1               | ZF:CTCGAGGCTATTCGGCCATTGACG<br>ZR:GAATTCTGACGGTGATGACGACGA<br>FF:TCTAGATGACGGTGATGACGACGA<br>FR:AAGCTTGCTATTCGGCCATTGACG |
| <b>For EMSA probes</b>    |                                                                                                                          |
| pMdAREB1A (SND1)          | F: AATAAAAAACATTTTTTATGGACGAAATTGCCCGG<br>R: CCGGGGCAATTTTCGTCCATAAAAAATGTTTTTTTATT                                      |
| pMdAREB1B (SND1)          | F: AAAGAGTCAAGGCTTCTTCTTAAGCAAGTAATAATA<br>R: TATTACTTGTCTTAGGAAGAAAGCCTTGACTCTTT                                        |
| pMdDREB2A (SND1)          | F: TCAGTGTTCAATTCTCCACCACACGGAATTGAACATG<br>R: CATGTTCAATTCCGTGTGGTGGAGAATTGAACACTGA                                     |
| pMdRD22 (SND1)            | F: CACTTGCAATTATCTTGAGGGACAAGGATTGTCTGCCC<br>R: GGGCAGACAATCCTTGTCCCTCAAGATAATGCAAGTG                                    |
| pMdRD29A (SND1)           | F: ACTTCTATCAACTTTGACATCAAAGCAAGAGCTGCCC<br>R: GGGCAGCTCTTGCTTTGATGTCAAAGTTGATAGAAGT                                     |
| pMdAREB1A (SND1)          | F: TCAGTGTTCAATTCTCCACCACACGGAATTGAACATG<br>R: CATGTTCAATTCCGTGTGGTGGAGAATTGAACACTGA                                     |
| pMdMYB46(SND1)            | F: TATTATGATTACCTTGAGAATGAAGAAAATAGGTTTA<br>R: TAAACCTATTTTCTTCATTCTCAAGGTAATCATAATA                                     |
| pMdMYB83A(SND1)           | F: TCGATTCATTTTTCTTCACTCACAAGGTAATCCTATAT<br>R: ATATAGGATTACCTTGTGAGTGAAGAAAAATGAATCGA                                   |
| pMdMYB83B(SND1)           | F: ATGATTCATTTTTCTTCACTCACAAGGTAATCATGTAC<br>R: GTACATGATTACCTTGTGAGTGAAGAAAAATGAATCAT                                   |
| <b>For reporter genes</b> |                                                                                                                          |
| pMdAREB1A-P1 (SND1)       | F: CTGCAG TAATTCAGATTGGATTGACCA<br>R: GGATCCTGCTGGCCAATGAGATTGCGC                                                        |
| pMdAREB1B-P1 (SND1)       | F:CTGCAG ATCCAATTAGGTAAAAAGGCA<br>R:GGATCC TGGGTTGTGAACTTGTGATCA                                                         |

pMdDREB2A-P2 (SND1) F:CTGCAG CATCGTGCATCGTGTGGTCAG  
R:GGATCC CACGAACCATTTTTCACTACC

pMdRD22-P3 (SND1) F:CTGCAGCAATTCAAGATGATCATTGAA  
R:GGATCCGTGTGGTCACGTATGTTAATA

pMdRD29A-P1 (SND1) F:GTCGACAGTCTCCAGAGTCTCGGAGCC  
R:GGATCCCGTAATGCAGTTGATCATTGA

pMdMYB46 (SND1) F: GTCGACATTCATATGTTGGGCTTGTT  
R: GGATCC GGGGTTGGTTGATGGGTCTGA

pMdMYB83A(SND1) F: GTCGACATCCTCAATAAGTTTCATGCA  
R: GGATCCGCTTAAAATATGCATATCAAA

pMdMYB83B(SND1) F: GTCGACAAAGGTGCAACACTTTGCCTA  
R: GGATCCGACCTCCGTGGCTCCATTCG

pMdMYB46m (SND1) F: TATTATGATTACCTTGAGAATGAATAAAATAGGTTTA  
R: TAAACCTATTTTATTCATTCTCAAGGTAATCATAATA

pMdMYB83Am (SND1) F: TCGATTCATTTTTCTTCACTCACAATGTAATCCTATATC  
R: GATATAGGATTACATTGTGAGTGAAGAAAAATGAATCGA

pMdMYB83Bm (SND1) F: TGATTCATTTTTCTTCACTCACAATGTAATCATGTAC  
R: GTACATGATTACATTGTGAGTGAAGAAAAATGAATCA

pMdAREB1A-P1m (SND1) F: AATAAAAAACATTTTTTATGGACTAAATTGCCCCGG  
R: CCGGGGCAATTTAGTCCATAAAAAATGTTTTTTTTATT

pMdAREB1B-P1m (SND1) F: AAAGAGTCAAGGCTTCTTCCTAATCAAGTAATAATA  
R: TATTACTTGTATTAGGAAGAAAGCCTTGACTCTTT

pMdDREB2A-P2m (SND1) F: TCAGTGTTC AATTCTCCACCACACTGAATTGAACATG  
R: CATGTTCAATTCAGTGTGGTGGAGAATTGAACACTGA

pMdRD22-P3m (SND1) F: CACTTGCATTATCTTGAGGGACAATGATTGTCTGCCC  
R: GGGCAGACAATCATTGTCCCTCAAGATAATGCAAGTG

pMdRD29A-P1m (SND1) F: ACTTCTATCAACTTTGACATCAAATCAAGAGCTGCCC  
R: GGGCAGCTCTTGATTTGATGTCAAAGTTGATAGAAGT

---

**For ChIP-qPCR**

pMdAREB1A-P1 F: GTCCTCAAGCCGACCGTTGT  
R: TGGTGGTGGCGACGGGATAAG

pMdAREB1B-P1 F: TAGTGACCTCACCATACTA  
R: GCACTTTCGGGAGAAGGAGGT

pMdAREB1B-P2 F: CCACGTTTCGAGATCTGATCG  
R: GGAAAATTGAGGGGGTACTG

|              |                                                       |
|--------------|-------------------------------------------------------|
| pMdAREB1B-P3 | F: CAGTAAGATTTAGAGAAACGG<br>R: TCATCAGAAGCAATCAACTTA  |
| pMdDREB2A-P1 | F: TTTACCTGCATAATATGAACA<br>R: ATGTTGATATGGTCATCGCAC  |
| pMdDREB2A-P2 | F: ATCTCTAAGATCGTCACAAAG<br>R: AATGTGTAGGGCAACGTGGCA  |
| pMdRD22-P1   | F: GCGTTTTTCAGCTCCCAATATA<br>R: GACACGTAGTTGGAGACAGCA |
| pMdRD22-P2   | F: CCAAGTAGGAAATGTGATGAA<br>R: TCTAGAATTCTTCACTGTTTT  |
| pMdRD22-P3   | F: CAACCATCTTAATTAGGTGTG<br>R: TGTTGACGTGGCTTAACCGTG  |
| pMdRD29A-P1  | F: GGTATACGAATACCACTAATT<br>R: CGTATTATGTATCAGAACAAA  |
| pMdMYB46     | F:ATTCATATGTTGGGCTTGGTT<br>R: TAGGGGTTGGTTGATGGGTCT   |
| pMdMYB83A    | F: TCTGCATATAAACTTCAATT<br>R: ATTATGTGAAGTGGAAGCAA    |
| pMdMYB83B    | F: GCCTAGTGACAAAGAGTACT<br>R: TTATTATGTGAAGTGGAAGCA   |

---

**For qRT-PCR**

|              |                                                    |
|--------------|----------------------------------------------------|
| MdDR22(DL)   | F: TGATGGGGTGAATGTAAAG<br>R: GAACCCAGACAACATGATCA  |
| MdSND1 (DL)  | F: ATCCTAATGATCAAGACA<br>R: GCACTTCCTATATATATT     |
| MdDR29A(DL)  | F: CTGAAGAAGGTAAAGGAGAA<br>R: CCTTCAAAATATCTCCTTGC |
| MdDR29B(DL)  | F: CCAAATTACCATGCCTCAAC<br>R: CCTTGGACTTGTACTCTCCC |
| MdAREB1A(DL) | F: CAGAGAATCAGCTGCCAGGT<br>R: TCTCCATGTCCTGATTCTTC |
| MdAREB1B(DL) | F: TTAGAACTAGAGGCAGAAGT<br>R: CTGTCAATGTTGTCGTAAG  |
| MdDREB2A(DL) | F: AAGAAAAGGAGGGGAGTAAT<br>R: ATAGTTGTAACCTCCATCTC |



|               |                                                         |
|---------------|---------------------------------------------------------|
| MdDREB2B(DL)  | F: CTCTAATTCTGTGTCATCTA<br>R: AACATGTAATTCCTCTGATA      |
| MdC4H(DL)     | F: ACATGAACCTCCAGGATGCCA<br>R: GAGATACCTGAAGTCGTTCCC    |
| MdC3H(DL)     | F: CTA CTTC CATT TGGAGCAGGC<br>R: CGGAGTAGGCACGACTTGGAC |
| MdCAD(DL)     | F: ATGCAAGAAGCTGCTGACTCA<br>R: GAAGCTCCCTGTGATTGTCTT    |
| MdF5H(DL)     | F: AGCCCTCTAGGTTTCTGAAAG<br>R: GTCAAGCTCACTAGGTTTCAT    |
| MdHCT(DL)     | F: TGCTTTGGTGCGTATGGATGA<br>R: CCAAAGTCGGCATCATGGATT    |
| Md4CL(DL)     | F: CCCTGATACGGGTGCTTCGCT<br>R: CGGTCGACGATGAAGAGCTCG    |
| MdCCR         | F: TCACATTCTGGTCTATGAGAC<br>R: CTTCTGGTTTGTGAACTTGTA    |
| MdCOMT(DL)    | F: GGTGAAGGTTGGGGGTTTGAT<br>R: GATTCGACGGCAGAGAGTGAT    |
| MdMYB46 (DL)  | F: CATCCTCACCTGCAATAAAAA<br>R: GG TAGTCAAGAAAAGGAAATG   |
| MdMYB83A (DL) | F: TTAACA ACTACCACTTCCATA<br>R: AGTATCCAGCATGAAACCCTC   |
| MdMYB83B (DL) | F: CAGTTGGTAGCTGATAATATA<br>R: ATCTTGCATGAAACCGTCGAA    |
| MdActin       | F: TGGTGAAGGCTGGATTTG<br>R: CTGTGAGCAGAACTGGGTG         |

---
